# Supplementary material for: Perception of Need and Receipt of Mental Health Treatment: A Three-Group Comparison of Young Adults With Psychological Distress
Source: Atypon-hosted journal article supplement (doi:10.1176/appi.ps.201500230), 2016-03-15
Supplement: appi.ps.201500230.ds001.pdf [file appi.ps.201500230.ds001.pdf]

Online Supplemental Table: Sample description, overall, and by perceived need and treatment group

|                                               | Overall<br>(n=19,775)<br>% | No perceived<br>need<br>(n=9997)<br>% | Unmet<br>need<br>(n=3105)<br>% | Received<br>treatment<br>(n=6673)<br>% |
|-----------------------------------------------|----------------------------|---------------------------------------|--------------------------------|----------------------------------------|
| <b>Race/ethnicity</b>                         |                            |                                       |                                |                                        |
| White                                         | 62.1                       | 53.7                                  | 63.4                           | 74.3                                   |
| African American                              | 12.3                       | 16.1                                  | 10.4                           | 7.3                                    |
| Asian                                         | 4.8                        | 6.2                                   | 3.8                            | 3.0                                    |
| Hispanic                                      | 17.3                       | 20.5                                  | 18.4                           | 11.9                                   |
| Other                                         | 3.6                        | 3.5                                   | 4.0                            | 3.4                                    |
| <b>Gender</b>                                 |                            |                                       |                                |                                        |
| Male                                          | 38.7                       | 46.3                                  | 31.4                           | 30.5                                   |
| Female                                        | 61.3                       | 53.7                                  | 68.6                           | 69.5                                   |
| Currently married                             | 8.9                        | 8.1                                   | 9.0                            | 10.0                                   |
| <b>Income</b>                                 |                            |                                       |                                |                                        |
| <20,000                                       | 34.3                       | 33.5                                  | 35.2                           | 35.0                                   |
| 20,001-50,000                                 | 32.6                       | 33.9                                  | 34.6                           | 29.7                                   |
| 50,001-75,000                                 | 12.9                       | 13.4                                  | 10.5                           | 13.4                                   |
| >75,000                                       | 20.2                       | 19.2                                  | 19.7                           | 21.9                                   |
| <b>Region</b>                                 |                            |                                       |                                |                                        |
| Urban                                         | 53.1                       | 53.9                                  | 55.0                           | 50.9                                   |
| Suburban                                      | 32.1                       | 31.1                                  | 31.3                           | 33.9                                   |
| Rural                                         | 14.9                       | 14.9                                  | 13.7                           | 15.2                                   |
| <b>Access Facilitators</b>                    |                            |                                       |                                |                                        |
| Has health insurance                          | 73.8                       | 69.3                                  | 70.7                           | 82.0                                   |
| Moved >6 times in past 5 years                | 9.9                        | 7.8                                   | 12.4                           | 11.8                                   |
| Arrested in past year                         | 9.2                        | 9.5                                   | 7.4                            | 9.6                                    |
| Served in military                            | 1.7                        | 1.5                                   | 1.5                            | 1.9                                    |
| Received substance use treatment in past year | 5.4                        | 3.7                                   | 3.3                            | 8.9                                    |
| <b>Education</b>                              |                            |                                       |                                |                                        |
| < high school                                 | 18.7                       | 20.6                                  | 17.4                           | 16.5                                   |
| High school                                   | 35.1                       | 38.0                                  | 34.2                           | 31.0                                   |
| Some college                                  | 34.1                       | 31.2                                  | 35.9                           | 37.8                                   |
| College degree or higher                      | 12.1                       | 10.2                                  | 12.6                           | 14.7                                   |
| Currently enrolled in school                  | 48.0                       | 46.1                                  | 48.3                           | 51.0                                   |
| <b>Employment status</b>                      |                            |                                       |                                |                                        |
| Full time                                     | 33.7                       | 36.5                                  | 32.3                           | 30.1                                   |
| Part time                                     | 28.6                       | 27.6                                  | 30.6                           | 29.0                                   |
| Unemployed                                    | 15.0                       | 15.8                                  | 15.7                           | 13.3                                   |

|                                         |      |      |      |      |
|-----------------------------------------|------|------|------|------|
| Not in labor force (i.e. disabled, etc) | 22.8 | 20.1 | 21.3 | 27.6 |
|-----------------------------------------|------|------|------|------|

**Need Indicators**

|                               |      |      |      |      |
|-------------------------------|------|------|------|------|
| Excellent or very good health | 59.0 | 62.5 | 56.6 | 54.7 |
|-------------------------------|------|------|------|------|

|                |      |      |      |      |
|----------------|------|------|------|------|
| Kessler-6 mean | 17.3 | 16.7 | 17.9 | 18.1 |
|----------------|------|------|------|------|

|                        |      |      |      |      |
|------------------------|------|------|------|------|
| Substance use disorder | 34.6 | 30.5 | 40.7 | 37.9 |
|------------------------|------|------|------|------|

---
